# Supplementary material
Source: ML conference proceedings conference paper supplement (https://proceedings.neurips.cc/paper_files/paper/2023/hash/5be3783ea9d43d7add5409c101d87d83-Abstract.html)
Supplement: Supplementary file 1 [file 5be3783ea9d43d7add5409c101d87d83-Supplemental-Conference.pdf]

## Appendix

Below we provide additional details and results which are not presented in the main manuscript.

### A Continual Learning with Open-InCA

With the Open-InCA adapter, each class prediction is isolated using a different dedicated query and classifier vector. For continual learning tasks, in addition to running multiple adapters in parallel as presented for multi-task results in Table 4, Open-InCA enables an even more granular composition of adapter sub-tasks. Recall the Open-InCA adapter architecture is defined as

$$[v_{\text{cross}}^1(\mathbf{z}), \dots, v_{\text{cross}}^c(\mathbf{z})] := \text{cross-attn}_{\theta}([z^1, \dots, z^T], [q_1, \dots, q_c])$$

$$\text{Open-InCA}_{\theta}(\mathbf{z}) := \text{diag-head}_{\theta} \circ \text{LN}([v_{\text{cross}}^1(\mathbf{z}), \dots, v_{\text{cross}}^c(\mathbf{z})])$$

With LN being LayerNorm. Due to the properties of each operator, each class prediction can be computed separately as

$$\text{Open-InCA}(\mathbf{z})_i = \langle W_i, \text{LN}(\text{cross-attn}_{\theta}([z^1, \dots, z^T], [q_i])) \rangle.$$

Because of this property we can remove a class prediction or add a new class prediction without any effects on other model predictions (as long as the parameters of cross-attn and LN remain fixed). As presented in Sec. 4 we use “query-only-training” which trains new adapter classes while freezing cross-attn, LN and enabling compatibility between task predictions.

When training with “query-only-training” the softmax function,  $\text{softmax}(u) = \frac{\exp(u^k)}{\sum_{i=1}^c \exp(u^i)}$ , indirectly combines predictions from all classes due the normalization in the denominator, which means gradients about a particular class  $i$  will include updates from other classes  $j$ . Instead, we can achieve complete training separation by using a Sigmoid final activation,  $\sigma(u) = \frac{\exp(u)}{\exp(u) + 1}$ , and a Binary Cross Entropy (BCE) loss that considers each prediction separately. Clearly in “query-only-training” the adapter representation capacity is reduced, since the cross-attention weights are not trained. We present an experiment evaluating the performance of InCA, Open-InCA and “query-only-training” Open-InCA in Table 6 and observe that despite the isolated and reduced parameter set in query-only-training of Open-InCA the method is still competitive and outperforms Linear Probing on most datasets.

Next we test Open-InCA for class-incremental learning, for which we consider the Split CIFAR-100 incremental learning benchmark. The Split CIFAR-100 dataset is trained with 10 incremental learning episodes each introducing 10 new classes. As in [10], we present the average episode accuracy and forgetting of “query-only-training” Open-InCa and additional baselines.

In particular we evaluate Open-InCa using a ViT-B/16 along with state of the art methods L2P [69], LwF [43] and EWC [23]. Nonetheless, we do not apply any special routing of our learned episodic models and simply combine their predictions. In contrast L2P is a prompt based approach that, during inference, passes each new sample to an auxiliary classifier to predict its corresponding episode (in this case a 10-way classifier) and the corresponding episode model is up-weighted according to the prediction. We believe that with such an auxiliary classifier Open-InCA performance can significantly improve, nonetheless we observe that Open-InCa can simply leverage a larger model efficiently to achieve state of the art accuracy. We leave routing of samples to different learned sub-models as an interesting avenue for future work.

In addition, Open-InCA has additional benefits as compared to typical class-incremental learning approaches:

- **Flexible incrementation** With Open-InCA different episodes can naturally contain a variable number of classes and episodes can be further decomposed if needed. This is since one can continue adding or removing single-class predictors from the Open-InCA adapter architecture by introducing or removing additional  $q_i$  and  $W_i$ .
- **Reduced forgetting risk** With Open-InCA the ability of adding new classes without forgetting is built-in into the architecture, as prediction of different classes ensures that the

603 previous class predictions remain the same (0 logit regression) which reduces catastrophic  
 604 forgetting.

605 • **Parameter and computation efficient** The Open-InCA adapter benefits from the InCA  
 606 approach, which is parameter efficient and computationally efficient during inference (see  
 607 Table 4) as well as during training (see Fig. 6 for comparison with prompts).

| Method               | Average Accuracy ( $\uparrow$ ) | Forgetting ( $\downarrow$ ) |
|----------------------|---------------------------------|-----------------------------|
| LP-sequential*       | 17.7                            | 59.1                        |
| Full-FT-sequential*  | 33.6                            | 86.9                        |
| EWC [34]             | 47.0                            | 33.3                        |
| LwF [43]             | 60.7                            | 27.8                        |
| L2P [69]             | <b>83.8</b>                     | <b>7.6</b>                  |
| Open-InCA (ViT-B/16) | <b>83.0</b>                     | <b>9.1</b>                  |
| Open-InCA (ViT-L/16) | <b>88.3</b>                     | <b>7.1</b>                  |
| Open-InCA (ViT-H/14) | <b>86.1</b>                     | <b>8.2</b>                  |

Table 5: **CIFAR-100 Class-Incremental Learning.** Split CIFAR-100 is trained with 10 episodes of 10 classes in the standard CIL evaluation suite [69]. Average accuracy and forgetting is reported over the 10 episodes according with [10]. \*Sequential fine-tuning results are taken from [69].

| Dataset        | Top-1 Test Error |             |                      |            |
|----------------|------------------|-------------|----------------------|------------|
|                | InCA             | Open-InCA   | Query only Open-InCA | In. LP     |
| CUB-200        | <b>9.1</b>       | 9.5         | 12.1                 | 16.2       |
| DTD            | 17.8             | <b>17.1</b> | 19.2                 | 18.9       |
| Aircrafts      | <b>15.8</b>      | 18.1        | 38.6                 | 50.6       |
| MIT-67         | 10.1             | 9.4         | <b>9.1</b>           | 9.7        |
| Oxford Flowers | <b>0.3</b>       | 0.4         | 0.4                  | 0.6        |
| Oxford Pets    | 4.7              | <b>4.0</b>  | 5.4                  | 6.1        |
| Stanf. Cars    | <b>8.4</b>       | <b>8.4</b>  | 22.8                 | 29.2       |
| Stanf. Dogs    | 8.1              | 5.7         | <b>5.3</b>           | <b>5.3</b> |
| Average        | 9.3              | <b>9.1</b>  | 14.1                 | 17.1       |

Table 6: **Open-InCA adapter performance** We compare InCA, Open-InCA, “query-training” Open-InCA and Intermediate Linear Probing (In. LP). We observe that Open-InCA is comparable with InCA and that “query-training” significantly out-performs In. LP.

## 608 B Intermediate Representation Signatures

609 The parallel training of InCA results in the synthesis of tens of models that can run inference with  
 610 insignificant per-adapter marginal costs. As a result we have the ability to glean highly useful  
 611 information about the network’s different representations and study the network inner representations  
 612 effectively. This is especially important for recent non-convolutional based architectures that do not  
 613 have as many inductive biases explaining some of their behavior. In this section we present results  
 showing information we retrieve from the performance of InCA adapters.

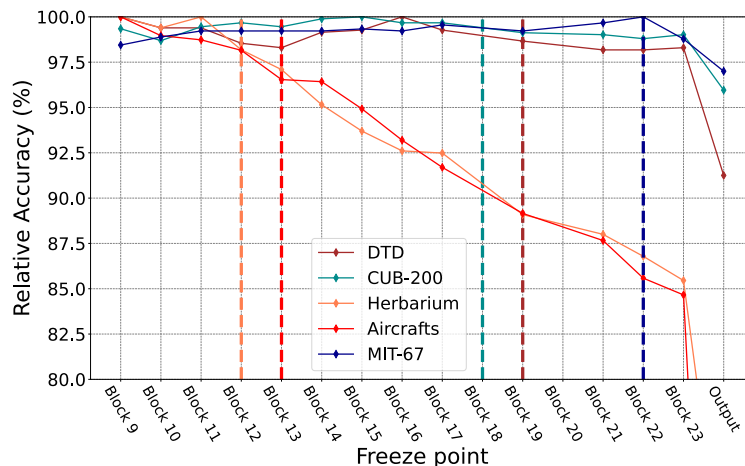

Figure 4: **Partial fine-tuning vs. InCA** Vertical dashed lines indicate the top InCA layer; curves show final test accuracy for different partial tuning training runs. Each mark indicates a run where all of the pre-trained model parameters are trained up to a “freeze point” in the network’s layers. Note partial tuning performance saturates in close proximity to the optimal InCA adapter layer. This is aligned with our hypothesis that full fine-tuning attempts to surface *existing representations already in the network*. In that case, performance improves until the tuning approach unlocks the capacity to utilize an existing relevant representation and performance plateaus afterwards.

## 615 B.1 Partial fine-tuning and adapter performance

616 Below we present in detail the experiments discussed in Sec. 5, in particular regarding partial  
 617 fine-tuning and InCA. The experiments illustrate the relationship between InCA adapters at different  
 618 layers with partial tuning. We tune the pre-trained model starting from different “freezing points”. In  
 619 particular for neural network  $f(x) = g_1 \circ \dots \circ g_l$ , for each freezing point  $g_m$  we consider its position  $m$   
 620 and all of the preceding layers and apply layer freezing to  $g_1, \dots, g_{m-1}$  (*i.e.* not updating gradients for  
 621 those layers). Back-propagation is then only applied for optimizing  $g_m, \dots, g_l$  including the network’s  
 622 prediction “head”. In Figure 4 we show the dynamics of partial tuning, where we optimize the  
 623 pre-trained network (ViT-L/16 DeiT pre-training) in different runs with each run having a different  
 624 freezing point. We compile the final Top-1 Test accuracy of each freezing run to create a partial  
 625 tuning “curve” for a single dataset. We compare the partial tuning performance curve of each dataset  
 626 with the corresponding top layer of the InCA adapter trained on that dataset and observe that they are  
 627 highly aligned, with datasets that prefer later InCA layers plateauing in their test accuracy earlier (at a  
 628 later freezing point). In particular what we observe is that partial tuning performance plateaus roughly  
 629 at the same layer where InCA identifies the top adapter representation. This is also the point at which  
 630 partial fine-tuning is capable of harnessing that representation for the downstream task. Overall  
 631 this gives further evidence that “*your representations are in the network*” and fine-tuning simply  
 632 surfaces existing representations that are already identified by InCA. When drawing the vertical lines  
 633 of the top InCA adapters, we refer to output layers, *e.g.*, the adapter at block 19 means the adapter  
 634 corresponding to the final output of block 19, or the first input of block 20.

## 635 B.2 Task Layer Affinities

636 In InCA we select top-performing adapters that “listen” to different intermediate representations of a  
 637 neural network. In our work we observe that one is able to achieve strong and diverse transfer learning  
 638 by utilizing intermediate representations, and that for challenging tasks it is often required to use  
 639 intermediate representations to achieve top results. Indeed the best representation layer for an adapter  
 640 tends to be highly robust to hyper-parameter variables of the optimization. Even more intriguingly, we  
 641 find that this representation affinity is preserved across different pre-trainings and even architectures.  
 642 This is, certain tasks have a strong “*affinity*” to a certain range of representation layers even for  
 643 different architectural circumstances. The majority of the architectures we consider have some  
 644 pre-trained component on one of the ImageNet datasets (aside from the CLIP ViT-L/14 model). At  
 645 the same time, the fact that different architectures give rise to similarly helpful representations gives  
 646 strong clues about the effect of different architectures as compared with the pre-training task during  
 647 learning over a large diverse dataset such as ImageNet.

648 In detail, we look at the best-performing InCA adapter for a fixed task on different architectures. The  
 649 pre-trained models we consider consist of 2 different pre-trainings of the ViT-L/16 architecture (ViT-  
 650 original and DeiT), the 384-resolution pre-training of DeiT with the resolution adjusted ViT-L/16,  
 651 CLIP’s ViT-L/14 architecture, the SWIN-L architecture, and the convolutional based ConvNext-  
 652 Base architecture. All of the vanilla ViTs we consider each have 24 residual transformer blocks  
 653 so that comparing between blocks is perfectly aligned. SWIN-L and ConvNext follow the “Stage”  
 654 breakdown of blocks, namely SWIN-L has (2,2,18,2) stage breakdown that conveniently also adds  
 655 up to 24 blocks (hence aligned in the figure) and lastly, ConvNext follows a (3-3-26-3) + head stage  
 656 block composition, which we rescale in the figures to fit on the same 24 block range. In addition in  
 657 the plots we also present the test error gap of each architecture with using the InCA adapter applied  
 658 on its final block representation. Tasks that prefer earlier layers such as Stanf. Cars and Aircraft have  
 659 a large gap from the performance of the last layer representation adaptation and such later layers lead  
 660 to sub-optimal results.

661 We remark that the work of InCA sheds light on the inner representations learned by neural networks  
 662 showing in some aspects performance is invariant to the architecture and more based on the pre-  
 663 training dataset. We leave this topic for further research and find it to be an intriguing topic of  
 664 study.

## 665 C Efficiency Results

666 InCA is highly efficient especially for large models, which is based on the isolated adapter architecture  
 667 that does not modify the backbone. We delineate the efficiency aspects as follows:

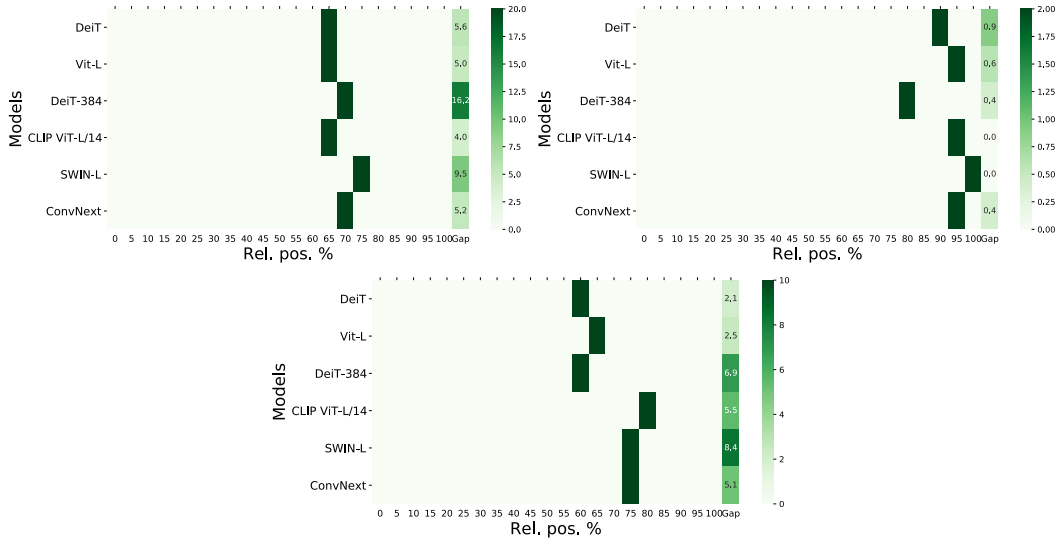

Figure 5: Best-performing representation for InCA adapter for Aircraft (Top-left) MIT-67 (Top-right) and Stanf. Cars (Bottom).

- 668 • **Training memory efficiency** The use of a frozen pre-trained model makes the training  
669 much more efficient and scalable since not all of the intermediate computations need to  
670 be stored as done in standard training or as required by methods that compute gradient  
671 information using inner-layers of the network. As soon as *any* intermediate layer requires  
672 a gradient, *all* subsequent activations must be cached in memory after the forward pass.  
673 This means methods like LoRA, FitBit and VPT all require caching of all of the activation  
674 maps for all of the layer operations in the network since they update parameters based on  
675 gradients from the very early layers in the network.
- 676 • **Fast optimization** Unlike typical parameter efficient methods that insert some form of train-  
677 able parameters in the network, InCA adapters are trained with “direct gradient” informa-  
678 tion coming from an isolated loss. Essentially each adapter corresponds to a very shallow neural  
679 network trained directly via back-propagation. This makes the training dynamics fast as  
680 direct gradient information about the loss easily reaches all of the adapter parameters. On  
681 the other hand, to update inserted parameters in the backbone, the gradient information is  
682 indirect and needs to be back-propagated through the backbone, with the risk of informa-  
683 tion loss and making the optimization more challenging, as we and the authors [32] observe  
684 regarding prompt tuning.
- 685 • **Efficient multi-task inference** As we present in Table 4 the unchanged backbone execution  
686 enables efficient and parallel inference efficiency as multiple tasks can be evaluated at once.

### 687 C.1 Computational Efficiency of InCA Compared with VPT

688 In Table 7 we observe that InCA is an order of magnitude more efficient to train than VPT . For the  
689 results in the table we consider the VPT-Deep adaptation method, that is trained with 50 prompt  
690 tokens in each layer. We report calculated training times in GPU-hours of a standard Nvidia-T4 GPU  
691 using a ViT-L/16 architecture and accuracy numbers based on the datasets of Table 1 with the DeiT  
692 pre-training. For larger architectures such as ViT-H/14 (“ViT Huge”) the difference in training-time  
693 is even more striking, as InCA maintains good per-run training time of 2.5, VPT-Deep requires  
694 staggering 55.8 GPU-hours per-run for a single GPU. On ViT-H/14 this is exacerbated as we must  
695 reduce the batch-size of VPT significantly to fit training on a common-place single GPU (Nvidia-T4).  
696 We measure in terms of training InCA and VPT-Deep for the same number of epochs. This however,  
697 is inaccurate as InCA trains an order of magnitude faster on a per epoch basis (see Figure 6).

| Method        | Mean Test Err. | Max. Full-FT gap | Training time per run (GPU hrs.) | # Hparam. per dataset | Train time per dataset (GPU hrs.) |
|---------------|----------------|------------------|----------------------------------|-----------------------|-----------------------------------|
| InCA          | <b>10.2</b>    | <b>2.4</b>       | <b>2.0</b>                       | 2 (parallel)          | <b>4.0 (2.4*)</b>                 |
| VPT Deep [32] | 12.3           | 6.8              | 5.8                              | 24                    | 139.6                             |

Table 7: **Computation costs of adaptation** We adapt ViT-L/16 to CUB-200 downstream classification with the same number of training epochs. We evaluate the training and computational costs of a single run and training VPT-Deep and InCA for one training dataset. \*Training with 2 learning rates in parallel leads to training time decreasing from 4.0 to 2.4 GPU-hours.

698 We attribute the difference in training time of InCA to:

- 699 1. InCA does not require back-propagation through the whole model which gives  $\sim 50\%$  speed  
700 improvement alone.
- 701 2. InCA is robust to hyper-parameters and we optimize it using just 2 learning rates, compared  
702 with the hyper-parameter set of VPT (in our experiments we use 24 hyper-parameter  
703 configurations per dataset while using the full configuration presented in [31] takes even  
704 longer). In addition, with “one-to-many” training, we train the two hyperparameters of  
705 InCA in parallel and report the specific training time in Table 7 denoted by (\*) for parallel  
706 hyper-parameter training.
- 707 3. InCA does not increase the number of propagated tokens in the transformer (*e.g.* in VPT  
708 with 100 propagated tokens the attention matrix doubles, from  $\sim 4 \times 10^4$  to  $\sim 9 \times 10^4$   
709 entries).

## 710 C.2 Optimization dynamics of InCA and VPT

711 In Fig. 6 we conduct an experiment where we train InCA and state of the art prompting method  
712 VPT-Deep [32] for different numbers of epochs and report the final test accuracy. We observe that  
713 InCA trains order of magnitude faster than prompting and reaches within 95% relative test accuracy  
714 after 3 training epochs.

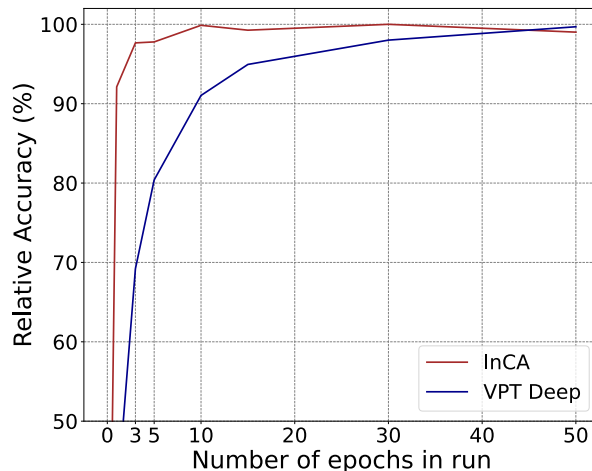

Figure 6: **Optimization Speed** for training InCA and prompt tuning (VPT-Deep) on the Aircrafts dataset. We train each method until completion with varying numbers of epochs and report the relative final test accuracy to 50 epoch training. The shallow adapter architecture and direct gradient signal in InCA makes the training of the adapter an order of magnitude faster (in terms of gradient updates) than prompt tuning approaches. Both methods use batch-size 32 and take the same number of gradient steps in each corresponding run, under the optimal learning rate.

715 **D Theoretical Analysis**

716 Empirically, we consistently observe that cross-attention as opposed to a linear or MLP-3 architecture  
 717 enables InCA to better harness the existing model. We present a theoretical result asserting that using  
 718 the cross-attention layer for aggregation as opposed to linear averaging, or even full-concatenation  
 719 followed by a large dimensional linear layer is capable of learning over a strictly broader set of data  
 720 distributions.

721 We give the precise statement in Theorem D.1 and intuitively argue that cross-attention with learned  
 722 queries has the ability to sift through irrelevant pieces of the representation that may be at *variable*  
 723 positions in different data samples.

724 Recall in the settings considered thus far, the extracted activation of an image data-point can be  
 725 viewed as  $\mathbf{x}_i \in \mathbb{R}^{d \times T}$  or  $T$  tokens e.g.  $\mathbf{x}_i = [x_i^1, x_i^2 \dots x_i^T]$ , with  $x_i^j \in \mathbb{R}^d$ . We argue that in many  
 726 scenarios, task-pertinent information is a property of individual *tokens* (e.g.  $x_i^j$ ) within a data-point  
 727  $\mathbf{x}_i$  and not a property of the overall feature map. We present the theorem below. To this end we define  
 728 a Token-Separability (TS) notion of a dataset.

729 **Definition 1** (Token-separable Dataset). *A dataset  $\mathcal{D} = \{(\mathbf{x}_1, y_1), \dots (\mathbf{x}_n, y_n)\}$  with  $\mathbf{x}_i =$   
 730  $[x_i^1, x_i^2, \dots x_i^T] \in \mathbb{R}^{d \times T}$  and  $y_i \in \{-1, 1\}$  is said to be linearly-token-separable if there exists  
 731 a scalar  $c > 0$  and  $w \in \mathbb{R}^d$  satisfying  $\|w\|_2 = 1$ , such that for each data point  $(\mathbf{x}_i, y_i) \in \mathcal{D}$  there  
 732 exists a token  $x_i^{j_i} \in \mathbf{x}_i$  with*

$$y_i(\langle x_i^{j_i}, w \rangle + b) \geq c. \quad (1)$$

733 We define  $(w_{\mathcal{D}}, b_{\mathcal{D}})$  and  $c_0$  as the maximum margin solution and maximum margin respectively, i.e.  
 734  $c_0 = \max_{\{w, b\}} \min_{\mathcal{D}} \{y_i(\langle x_i^{j_i}, w \rangle + b)\}$  for  $\mathcal{D}$  with  $(w_{\mathcal{D}}, b_{\mathcal{D}})$  corresponding to the selected  
 735  $c_0$ .

736 Intuitively,  $\mathcal{D}$  is a TS-dataset if each of its data points contain a token that leads to linear separability  
 737 (the same  $w$  shared among all points  $\mathbf{x}_i \in \mathcal{D}$ ). One can further distinguish between *aligned*-TS  
 738 Datasets, where the index  $j_i$  of the linearly separating token is consistent among the  $n$  data points,  
 739 or *permutable*-TS where  $j$  is dependent on  $i$ . Further TS datasets can be generalized to  $k$ -token  
 740 separable datasets where  $k$  tokens are responsible for separability in each  $\mathbf{x}_i$ , for this theoretical  
 741 contribution we don't make an assumption on whether the dataset is aligned or permuted, but consider  
 742 the setting provided by Definition 1 (i.e. not the  $k$ -separable generalization). We present an analytical  
 743 statement for the advantage of cross-attn, the theorem is provided for binary classification via a  
 744 scalar prediction, but can conventionally extend to  $C$ -class classification. For binary classification we  
 745 define a prediction via the standard scalar binary aggregator as  $\sigma(u) = \text{sign}(\sum_i u_i)$  that converts a  
 746 vector into a binary prediction.

747 **Theorem D.1.** *Let  $\mathcal{D}$  be a binary-class, token-separable dataset with max-margin  $c_{\mathcal{D}}$  and max-  
 748 margin solution  $(w_{\mathcal{D}}, b_{\mathcal{D}})$  consisting of  $n$  data points. Suppose that  $\mathcal{D}$  is distributed such that for  
 749  $\mathbf{x}_i = (x_i^1, \dots x_i^T)$  with  $(\mathbf{x}_i, y_i) \in \mathcal{D}$  are normalized for separating token  $x_i^{j_i} \in \mathcal{D}$  and that the rest of  
 750 the tokens correspond to "noise",  $x_i^k \sim N(0, I/d)$ ,  $\mathbb{E}\|x_i^k\|_2^2 = 1$ . Furthermore assume*

$$c_{\mathcal{D}} \geq \max \left( \sqrt{\frac{32}{d}} (\log(1/\delta) + \log(2nT)), 2|b_{\mathcal{D}}| \right). \quad (2)$$

751 *Then there exists a cross-attention classifier*

$$f(x; q, \{W\}, b) = \sigma \left( \sum_{l=1}^T \text{cross-attn}(\mathbf{x}, q)_l + b \right) \quad (3)$$

752 *that separates  $\mathcal{D}$  with probability at least  $1 - \delta$ . In contrast, every fixed member  $g(\mathbf{x}; w, b) =$   
 753  $\sigma \left( \sum_{l=1}^T \mathbf{x}_i \cdot w + b \right)$  of the linear classifier family will fail to separate  $\mathcal{D}$  with probability at least  
 754  $\frac{1}{\sqrt{2\pi}} \frac{s}{s^2+1} \exp(-s^2/2)$  where  $s = \frac{\sqrt{d}}{\sqrt{T-1}} c_{\mathcal{D}}$ .*

755 As stated above, the failure probability of the simple linear classifier  $g$  depends on  $s$  which satisfies  
 756  $s \sim \sqrt{d/T}$ . For existing architectures  $d, T$  tend to have a similar order of magnitudes, e.g. for  
 757 ViT-B/16,  $d = 768, T = 196$  which makes the failure probability non-negligible. Before presenting  
 758 the proof, we make the following observation: in InCA, we use the same cross-attn layer with latent  
 759  $q$ , which we show can be simplified via reparameterization.

760 **Observation D.2** (Query Collapse Reparameterization). A single-head cross-attention param-  
 761 eterization with latent  $[q]$  is equivalent to the following simplified layer,  $\text{cross-attn}(\mathbf{x}, q) =$   
 762  $\sum \text{softmax}(q^* \mathbf{x}) \odot \mathbf{W} \mathbf{x}$  with  $q^* \in \mathbb{R}^d$ .

763 This can be derived by decomposing the attention score which is the input to softmax.

$$a_j = \langle \mathbf{W}_q q, \mathbf{W}_k x^j \rangle = (\mathbf{W}_q q)^\top (\mathbf{W}_k x^j) =$$

$$q^\top \mathbf{W}_q^\top \mathbf{W}_k x^j = (q^*)^\top x^j.$$

764 Where  $q^* = q^\top \mathbf{W}_q^\top \mathbf{W}_k$  and  $q^* \in \mathbb{R}^d$ , hence the cross-attn layer simplifies, which is used in the  
 765 proof.

766 As our proof shows, the cross-attn layer can operate on a large data bandwidth, e.g.  $\mathbf{x} \in \mathbb{R}^{d \times T}$   
 767 while still being selective in finding task specific representations. Empirically we also observe that  
 768 increasing the number of heads of cross-attn also improves the performance of the InCA. This is in  
 769 part because it enables the learned latent query parameter  $q$  to identify more useful token patterns,  
 770 and since  $q$  is fixed using more heads remain stable (as opposed to when  $q$  is a data input). We now  
 771 present the proof of the claim.

### 772 Proof of Theorem D.1

773 *Proof.* The proof of the theorem has two parts A) the positive condition on the cross-attn layer and  
 774 B) the negative condition on the linear layer (a non-separability probability lower bound). We start  
 775 with A) and consider separability of positive and negative data samples in turn. First we simplify and  
 776 write an equivalent cross-attention binary classifier expression for the cross-attn classifier.

777 **Positive result for the cross-attention model** We consider a “single-head” cross-attention layer  
 778 and by Observation D.2 we can write the cross-attn layer as follows

$$\text{cross-attn}(\mathbf{x}_i; q, \{\mathbf{W}\}) = \sum_{j=1}^T \text{softmax}(\langle x_i^j, q^* \rangle) \cdot \mathbf{W}_v x_i^j. \quad (4)$$

779 Note that softmax is a function of the entire vector  $\{\langle x_i^j, q^* \rangle\}_{j \in [1, T]}$ , however we write it in the  
 780 form above to illustrate the summed terms. For simplicity of notation, we drop the asterisk and write  
 781  $q^* \in \mathbb{R}^d$  as  $q$ . Combining cross-attn with the binary aggregator, we have aggregation over the output  
 782 vector of the cross-attn layer.

$$f(\mathbf{x}_i; q, \{W\}, b)$$

$$= \sigma \left( \sum_{l=1}^d (\text{cross-attn}(\mathbf{x}_i; q, \{W\}))_l + b \right).$$

783 Define  $S(\mathbf{x}_i, q) \in \mathbb{R}^{1 \times T}$  as the computed softmax argument,

$$S(\mathbf{x}_i, q) = S = \text{softmax}([\langle x_i^1, q \rangle, \dots, \langle x_i^T, q \rangle]). \quad (5)$$

784 Substituting into the classifier, we have

$$f(\mathbf{x}_i; q, \{\mathbf{W}\}, b) = \sigma \left( \sum_{l=1}^d \left( \sum_{j=1}^T S_j \cdot \mathbf{W}_v x_i^j \right)_l + b \right)$$

$$= \sigma \left( \sum_{j=1}^T S_j \sum_{l=1}^d (\mathbf{W}_v x_i^j)_l + b \right).$$

785 Let  $u = \sum_{l=1}^d (\mathbf{W}_v)_{[l, :]}$  be the sum of the rows of  $\mathbf{W}_v$ . Note  $x_i^j$  can be pulled out from the inner  
 786 summation to give

$$f(\mathbf{x}; q, u, b) = \sigma \left( \sum_{j=1}^T S_j \langle u, x_i^j \rangle + b \right).$$

787 Thus the cross-attn classifier presented is equivalent to the parameterization above. Next we consider  
 788 the two terms in the sum, namely  $S_j$  and  $\langle u, x_i^j \rangle$ . We will be deriving their distribution in the case  
 789 where a data point  $(\mathbf{x}_i, y_i)$ , has prediction labels  $y_i = 1$  and  $y_i = -1$  separately. We start with  $y_i = 1$   
 790 and consider

$$S_k = \frac{\exp(\langle x_i^k, q \rangle)}{\sum_{j=1}^T \exp(\langle x_i^j, q \rangle)}. \quad (6)$$

791 Take  $j_i$  to be the separating token for sample  $\mathbf{x}_i$ . By the assumption of the theorem for  $k \neq j_i$  the  
 792 tokens correspond to isotropic noise of expected squared norm 1, i.e.  $\mathbf{x}_i^k \sim N(0, I/d)$ . For a fixed  
 793  $u \in \mathbb{R}^d$  with  $\|u\|_2 = 1$ , we take  $\eta_k$  to be the distribution of the dot product,

$$\eta_k = \langle u, \mathbf{x}_i^k \rangle = \sum_l (u)_l \cdot (\mathbf{x}_i^k)_l. \quad (7)$$

794 For  $k \neq j_i$  this is a sum of independent Gaussians and each coordinate is distributed as  $\sim N(0, \frac{u_l^2}{d})$ .  
 795 As such we have

$$\begin{aligned} \langle u, \mathbf{x}_i^k \rangle &\sim N\left(0, \sum_l \frac{1}{d} \cdot u_l^2\right) = N(0, \|u\|_2^2/d) \\ &= N(0, 1/d) \end{aligned}$$

796 since  $\|u\|_2 = 1$ . Next we consider  $k = j_i$ . By the hypothesis we have that

$$y_i(\langle \mathbf{x}_i^{j_i}, w_{\mathcal{D}} \rangle + b_{\mathcal{D}}) \geq c_{\mathcal{D}}.$$

797 With positive label ( $y_i = 1$ ) this gives  $\langle \mathbf{x}_i^{j_i}, w_{\mathcal{D}} \rangle + b_{\mathcal{D}} \geq c_{\mathcal{D}}$ . Note that since  $c_{\mathcal{D}} \geq 2|b_{\mathcal{D}}|$  we have  
 798 that  $\langle \mathbf{x}_i^{j_i}, w_{\mathcal{D}} \rangle \geq c_{\mathcal{D}}/2$ . Since  $w_{\mathcal{D}}$  is the maximal margin solution, we have  $\|w_{\mathcal{D}}\| = 1$  and  $c_{\mathcal{D}} > 0$ .  
 799 Take  $q$  to be of the form  $q = t \cdot w_{\mathcal{D}}$  for  $t \in \mathbb{R}^+$  and  $u = w_{\mathcal{D}}$ , then

$$t \cdot \eta_{j_i} = \langle x_i^{j_i}, q \rangle = t \langle x_i^{j_i}, w_{\mathcal{D}} \rangle \geq t \cdot c_{\mathcal{D}}/2. \quad (8)$$

800 For  $\eta_k, k \neq j_i$ , separating  $t$ , we have that  $\langle x_i^k, q \rangle = t \cdot \eta_k$ . Define  $M = \max_{k \neq j_i} (|\eta_k|)$ .  $M$  is  
 801 a random variable distributed as the maximum of  $T - 1$  i.i.d. Gaussians distributed according  
 802 to  $N(0, 1/d)$ . We bound  $M$  by investigating an upper bound of the Gaussian CDF. Recall that the  
 803 moment generating function of a Gaussian random variable  $X \sim N(0, 1)$  is given by  $M_X(r) =$   
 804  $\mathbb{E}[e^{rX}] = e^{\frac{1}{2}r^2}$ . Then note that for any  $s > 0$  we have

$$\mathbb{P}(X \geq r) = \mathbb{P}(e^{sX} \geq e^{sr}) \leq e^{-sr} M(s) = e^{-sr + \frac{1}{2}s^2}$$

805 where the inequality is an application Markov's inequality. Setting  $s = r$  this gives the tail bound

$$\mathbb{P}(X \geq r) \leq \exp(-r^2/2). \quad (9)$$

806 For our settings with  $\eta_k \sim N(0, 1/d)$

$$\mathbb{P}(\eta_k \geq r) \leq \exp(-dr^2/2). \quad (10)$$

807 For a two-sided bound, by symmetry of the distribution we have

$$\mathbb{P}(|\eta_k| \geq r) \leq 2 \exp(-dr^2/2). \quad (11)$$

808 Therefore a union bound results in

$$\begin{aligned} \mathbb{P}(M \geq r) &= \mathbb{P}\left(\bigcup_{k \neq j_i} |\eta_k| \geq r\right) \\ &\leq \sum_{k \neq j_i} \mathbb{P}(|\eta_k| \geq r) \\ &\leq (T - 1) \cdot 2 \exp(-dr^2/2) \\ &\leq 2T \exp(-dr^2/2). \end{aligned}$$



809 We can bound the bulk of the distribution of  $M$  as

$$\mathbb{P}(M < r) \geq 1 - 2T \exp(-dr^2/2). \quad (12)$$

810 Taking  $r = c_{\mathcal{D}}/4$ , then with probability at least  $1 - 2T \exp(-d(c_{\mathcal{D}}/4)^2/2) = 1 -$   
 811  $2T \exp(-d(c_{\mathcal{D}})^2/32)$  we have

$$M = \max_{k \neq j_i} |\eta_k| < \frac{c_{\mathcal{D}}}{4} \quad (13)$$

812 and thus

$$\max_{k \neq j_i} (\langle q, x_i^k \rangle) < \frac{tc_{\mathcal{D}}}{4}. \quad (14)$$

813 With high probability, Eq. (13) holds. This implies that for  $j_i$ ,

$$\begin{aligned} S_{j_i} &= \frac{\exp(\langle x_i^{j_i}, q \rangle)}{\sum_{j=1}^T \exp(\langle x_i^j, q \rangle)} \\ &= \frac{1}{1 + \sum_{j \neq j_i}^T \exp(\langle x_i^j, q \rangle - \langle x_i^{j_i}, q \rangle)} \\ &\geq \frac{1}{1 + \sum_{j \neq j_i}^T \exp(\langle x_i^j, q \rangle - tc_{\mathcal{D}}/2)} \\ &\geq \frac{1}{1 + \sum_{j \neq j_i}^T \exp(-tc_{\mathcal{D}}/4)} \\ &= \frac{1}{1 + (T-1) \exp(-tc_{\mathcal{D}}/4)} \\ &= 1 - \frac{(T-1) \exp(-tc_{\mathcal{D}}/4)}{1 + (T-1) \exp(-tc_{\mathcal{D}}/4)}. \end{aligned}$$

814 Note that  $c_{\mathcal{D}} > 0$  and  $T$  is fixed. Nonetheless, the probability bound is independent of  $t$  which may  
 815 take arbitrarily values, e.g. for any  $\epsilon > 0$ , take  $t = 4/c_{\mathcal{D}} \log(T/\epsilon)$ , which gives

$$S_{j_i} \geq 1 - \epsilon. \quad (15)$$

816 Since  $S_k \geq 0$  for each  $k$  and  $\sum_{k=1}^T S_k = 1$  we have for  $k \neq j_i$ ,

$$S_k \leq \sum_{j \neq j_i} S_j = 1 - S_{j_i} \leq \epsilon. \quad (16)$$

817 We consider the classifier prediction

$$f(\mathbf{x}; q, u) = \sigma \left( \sum_{j=1}^T S_j \langle u, x_i^j \rangle + b \right) \quad (17)$$

818 where  $b$  is a bias parameter we can choose. Recall  $u = w_{\mathcal{D}}$ . Focusing on the inside of the sign  
 819 function

$$\begin{aligned} \sum_{j=1}^T S_j \langle w_{\mathcal{D}}, x_i^j \rangle &= S_{j_i} \langle w_{\mathcal{D}}, x_i^{j_i} \rangle + \sum_{k \neq j_i} S_k \eta_k \\ &\geq S_{j_i} \langle w_{\mathcal{D}}, x_i^{j_i} \rangle - \sum_{k \neq j_i} S_k \max_{j \neq j_i} (|\eta_j|) \\ &\geq (1 - \epsilon) c_{\mathcal{D}}/2 - \epsilon \cdot c_{\mathcal{D}}/4 \\ &= (1 - (3/2)\epsilon) c_{\mathcal{D}}/2 > \frac{c_{\mathcal{D}}}{4} \end{aligned}$$

820 provided that  $\epsilon < 1/3$ . If we take  $b = -\frac{c_{\mathcal{D}}}{4}$  we have that for  $q = tw_{\mathcal{D}}$  and  $u = w_{\mathcal{D}}$

$$f(\mathbf{x}_i; q, u, b) = \sigma \left( \sum_{j=1}^T S_j \langle w_{\mathcal{D}}, x_i^j \rangle + b \right) = 1 = y_i. \quad (18)$$

821 Next we address the case where  $y_i = -1$ . We consider the classifier prediction

$$f(\mathbf{x}; q, u, b) = \sigma \left( \sum_{j=1}^T S_j \langle u, x_i^j \rangle + b \right) \quad (19)$$

822 with  $u = w_{\mathcal{D}}$ . Again for  $k \neq j_i$  we have that

$$\max_{k \neq j_i} (\langle u, x_i^k \rangle) < c_{\mathcal{D}}/4. \quad (20)$$

823 On the other hand for  $j_i$ ,  $y_i = -1$  we have that

$$\begin{aligned} y_i (\langle x_i^{j_i}, w_{\mathcal{D}} \rangle + b_{\mathcal{D}}) &\geq c_{\mathcal{D}} \\ \implies \langle x_i^{j_i}, w_{\mathcal{D}} \rangle + b_{\mathcal{D}} &\leq -c_{\mathcal{D}} \\ \implies \langle x_i^{j_i}, w_{\mathcal{D}} \rangle &\leq -c_{\mathcal{D}}/2 < 0 \end{aligned}$$

824 where we have used the hypothesis that  $c_{\mathcal{D}} \geq 2|b_{\mathcal{D}}|$  in the last line. We consider the term inside the  
825 classifier. We note that

$$\begin{aligned} \sum_{k=1}^T S_k \langle u, x_i^k \rangle &< \sum_{k \neq j_i}^T S_k \langle u, x_i^k \rangle \\ &< \sum_{k \neq j_i}^T S_k \cdot (c_{\mathcal{D}})/4 \\ &\leq c_{\mathcal{D}}/4 \end{aligned}$$

826 where in the first inequality we have used the fact that  $S_{j_i} \langle u, x_i^{j_i} \rangle < 0$  and in the last inequality we  
827 have used the fact that  $\sum_{j=1}^T S_j = 1$ . Therefore again with bias term  $b = -c_{\mathcal{D}}/4$  we have that

$$\sum_{j=1}^T S_j \langle u, x_i^j \rangle + b < 0 \quad (21)$$

828 and  $f(\mathbf{x}_i; q, u, b) = -1 = y_i$ . Thus we have just shown that with probability  $1 -$   
829  $2T \exp(-d(c_{\mathcal{D}})^2/32)$  the model  $f(x; q, u, b)$  with  $u = w_{\mathcal{D}}, q = tw_{\mathcal{D}}, b = -c_{\mathcal{D}}/4$  gives the cor-  
830 rect label for  $\mathbf{x}_i$ . Taking the union bound over all  $n$  points in  $\mathcal{D}$  we get with probability at least  
831  $1 - 2Tn \exp(-d(c_{\mathcal{D}})^2/32) \geq 1 - \delta$  the model  $f(x; q, u, b)$  with  $u = w_{\mathcal{D}}, q = tw_{\mathcal{D}}, b = -c_{\mathcal{D}}/4$   
832 separates  $\mathcal{D}$ .

833 **Negative result for the linear model** We consider the linear classifier

$$g(\mathbf{x}; w, b) = \sigma \left( b + \sum_{j=1}^T \langle w, x^j \rangle \right) \quad (22)$$

834 where  $w \in \mathbb{R}^d$  is restricted to have unit norm  $\|w\| = 1$ . For an input  $\mathbf{x}_i$  under the aggregation, the  
835 term inside the sign function simplifies to

$$\sum_{j=1}^T \langle w, x_i^j \rangle = \langle w, \sum_{j=1}^T x_i^j \rangle.$$

836 We recall that the  $x_i^k$  for  $k \neq j_i$  are distributed according to  $N(0, \frac{1}{d}I)$ . Thus we have that

$$\alpha_i := \sum_{k \neq j_i} x_i^k \sim N \left( 0, \frac{T-1}{d} \right). \quad (23)$$

837 So the problem of classification is equivalent to learning a linear classifier over the separating tokens  
838 under the presence of Gaussian noise with distribution  $N(0, \frac{T-1}{d})$ . Let  $i^*$  be the index corresponding  
839 to the input  $\mathbf{x}_{i^*}$  with smallest margin, i.e.

$$i^* = \operatorname{argmin}_i y_i (\langle w, x_i^{j_i} \rangle + b_{\mathcal{D}}).$$

840 Then we have that  $y_{i^*}(\langle w, x_{i^*}^{j_{i^*}} \rangle + b_{\mathcal{D}}) \leq c_{\mathcal{D}}$ . We note that any linear classifier  $g(\mathbf{x}; w, b)$  with  
 841  $\|w\|_2 = 1$  will fail to classify  $\mathcal{D}$  whenever  $y_{i^*} \alpha_{i^*} < -c_{\mathcal{D}}$ . Thus we will lower bound the probability  
 842 of  $\mathbb{P}(y_{i^*} \alpha_{i^*} < -c_{\mathcal{D}})$ . Note for a standard Gaussian random variable  $\eta \sim N(0, 1)$  as shown in [14]  
 843 we have for  $r > 0$

$$\mathbb{P}(\eta > r) \geq \frac{1}{\sqrt{2\pi}} \frac{r}{r^2 + 1} \exp(-r^2/2). \quad (24)$$

844 Set  $s = \frac{\sqrt{d}}{\sqrt{T-1}} c_{\mathcal{D}}$ . Then by symmetry of the Gaussian distribution the above bound translates into  
 845 the following bound for  $\alpha_{i^*}$

$$\mathbb{P}(y_{i^*} \alpha_{i^*} < -c_{\mathcal{D}}) \geq \frac{1}{\sqrt{2\pi}} \frac{s}{s^2 + 1} \exp(-s^2/2).$$

846 It follows that for any  $w \in \mathbb{R}^d$  such that  $\|w\|_2 = 1$  that the linear classifier  $g(\mathbf{x}; w, b)$  incorrectly  
 847 classifies  $\mathcal{D}$  with probability at least

$$\frac{1}{\sqrt{2\pi}} \frac{s}{s^2 + 1} \exp(-s^2/2).$$

848 This completes the second part of the proof.  $\square$

## 849 E Further Results

850 We present additional experiments below. In Subsection E.1 we present per-dataset results for  
 851 additional architectures and a discussion about ensembling InCA is given in Subsection E.2.

### 852 E.1 Per-dataset results for different architectures as presented in Table 2

853 Table 8 provides per-dataset results that are presented in aggregate in Table 2. Below we present the  
 854 results for ConvNext-Base and ViT-L/16 (original pre-training) pre-trained models (with the results  
 855 for ViT-L/16 DeiT and SWIN-L presented in Table 1 and Table 3 respectively).

### 856 E.2 Ensembling learned adapters

857 Because of “one-to-many” inference of InCA can take a set of independently learned adapters and  
 858 ensemble them without a marginal increase to the inference cost. We follow non-parametric equal-  
 859 weight ensembling, by taking the output predictions of two adapters  $h_1(x), h_2(x)$  on a sample image  
 860  $x$ . Note that the adapters are computed with their relevant representations via a single forward pass,  
 861 which makes the execution of  $h_1(x)$  and  $h_2(x)$  together only incrementally higher than computing  
 862 just  $h_1(x)$ . The ensemble is defined as

$$h^*(x) = \frac{h_1(x) + h_2(x)}{2}. \quad (25)$$

863 Given the large combinatorial selection of  $k$  adapters from the  $l$  learned adapters we consider the case  
 864 of ensembling with two adapter members. After training we evaluate all  $m(m-1)/2$  such pairs and  
 865 compare them with the top performing single layer predictor which we present in Figure 7. In the  
 866 figure, we illustrate the representations and corresponding adapter pairs that lead to best performance  
 867 and also present the computed ensemble gain which is the difference between the ensembled model  
 868 accuracy and the top accuracy of any single adapter.

869 In addition to improving classification accuracy, ensembling can aid in improving robustness and  
 870 out of distribution performance which we leave as a future work. Further directions of ensembling  
 871 include ensembling performance when using adapters of different adapter architectures (e.g. an  
 872 MLP-3 ensembled with an InCA adapter) or adapters that use representations from different neural  
 873 networks [20].

### 874 E.3 Ablation on the number of queries

875 We apply an ablation to see the effects of using a different number of queries in the InCA adapter  
 876 architecture. In particular, the InCA adapter is written as,

$$\begin{aligned} v_{\text{cross}}(\mathbf{z})_{[1:m]} &:= \text{cross-attn}_{\theta}([z^1, \dots, z^T], [q_1, \dots, q_m]) \\ \text{InCA}_{\theta}(\mathbf{z}) &:= \text{head}_{\theta} \circ \text{norm}(\text{avg-pool}(v_{\text{cross}}(\mathbf{z})_{[1:m]})). \end{aligned}$$

| Top-1 Test Error for ConvNext-B |                  |             |              |              |              |
|---------------------------------|------------------|-------------|--------------|--------------|--------------|
| Dataset                         | Full fine-tuning | InCA        | InCA (last)  | Inter. LP    | LP           |
| CUB-200                         | 9.3              | 9.3         | 9.3          | 13.0         | 13.0         |
| DTD                             | 16.7             | 17.4        | 17.4         | 18.6         | 18.6         |
| Flood Depth                     | 16.9             | 16.5        | 20.5         | 19.4         | 19.9         |
| EuroSAT                         | 0.9              | 1.6         | 2.2          | 2.8          | 3.1          |
| Aircrafts                       | 10.5             | 17.9        | 23.1         | 54.7         | 54.7         |
| Herbarium                       | 17.0             | 22.7        | 26.4         | 37.4         | 39.5         |
| MIT-67                          | 10.9             | 10.3        | 10.7         | 10.2         | 10.4         |
| Oxford Flowers                  | 0.5              | 0.4         | 0.4          | 0.6          | 0.6          |
| Oxford Pets                     | 5.2              | 4.6         | 5.6          | 5.9          | 6.0          |
| Stanf. Cars                     | 6.8              | 9.3         | 14.4         | 39.9         | 39.9         |
| Stanf. Dogs                     | 8.9              | 7.6         | 7.6          | 7.3          | 7.3          |
| Ave. Top-1 Test Error           | 9.4              | 10.7 (-7.4) | 12.8 (-12.6) | 19.7 (-44.2) | 20.0 (-44.2) |

  

| Top-1 Test Error for ViT-L/16 (ViT pre-training) |                  |             |              |              |              |
|--------------------------------------------------|------------------|-------------|--------------|--------------|--------------|
| Dataset                                          | Full fine-tuning | InCA        | InCA (last)  | Inter. LP    | LP           |
| CUB-200                                          | 11.7             | 10.9        | 10.9         | 12.2         | 12.2         |
| DTD                                              | 18.3             | 18.9        | 20.1         | 19.9         | 20.1         |
| Flood Depth                                      | 20.8             | 18.1        | 18.7         | 18.7         | 18.7         |
| EuroSAT                                          | 0.8              | 1.1         | 1.9          | 2.5          | 3.5          |
| Aircrafts                                        | 20.7             | 23.2        | 28.2         | 44.5         | 46.4         |
| Herbarium                                        | 20.3             | 26.9        | 31.3         | 38.9         | 41.3         |
| MIT-67                                           | 12.8             | 11.3        | 11.9         | 10.4         | 11.1         |
| Oxford Flowers                                   | 0.6              | 0.3         | 0.4          | 0.3          | 0.4          |
| Oxford Pets                                      | 5.5              | 5.3         | 5.4          | 6.5          | 6.5          |
| Stanf. Cars                                      | 9.3              | 10.9        | 12.9         | 27.6         | 30.2         |
| Stanf. Dogs                                      | 11.0             | 10.4        | 10.4         | 10.1         | 10.1         |
| Ave. Top-1 Test Error                            | 12.0             | 12.5 (-6.6) | 13.8 (-11.0) | 17.4 (-23.8) | 18.2 (-25.7) |

Table 8: **Per-dataset Adaptation Top-1 Test Error on various architectures** We test transfer learning performance of fine-grained datasets applied to different architectures and pre-trainings including, ViTs, SWIN, and convolutional networks. We report the per-dataset Top-1 test error for the 11 datasets presented in Table 2

877 For  $m > 1$  the output of tokens  $[q_1, \dots, q_m]$  through the cross-attn layer are averaged, and we test  
878 whether using  $m > 1$  brings additional representational benefit to each adapter. We present the result  
879 in Table 9 and observe that using a different  $m$  does not have a consistent effect on the accuracy of the  
880 learned adapters, and in our experiments we use  $m = 1$  for InCA adapters to be most computationally  
881 efficient.

## 882 F Implementation details

883 We present the optimization and augmentation details for training InCA, and note we use standardized  
884 procedures for augmentation and training (without extensive hyper-parameter optimization) of the  
885 different transfer learning methods we evaluate.

886 **Augmentation** Unless otherwise specified we train with input image size 224 and standard augmen-  
887 tation practice [59]. In particular, during training we resize to image-size 256 and apply random  
888 cropping, for testing we apply resizing and center cropping. For larger image resolutions we maintain  
889 the same resize-crop ratio of 0.875.

890 **Optimization** For the linear probing and InCA approaches, we train with the AdamW optimizer  
891 [47], cosine annealing learning rate scheduler [48] for 30 epochs and with weight decay  $1e-4$ .  
892 In each method we sweep over 2 learning rates  $lr = \{1e-4, 3e-4\}$ . For full fine-tuning, we also  
893 train with AdamW optimizer (weight decay  $1e-4$ ), cosine annealing for 30 epochs, but in addition,  
894 identify optimal learning rates for each pre-training and architecture separately. We first identify an

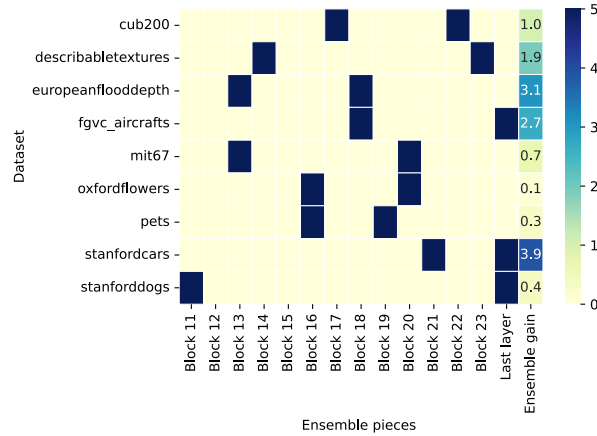

Figure 7: **Optimal Representation pairings** Optimal ensemble pairs of InCA of listeners at different locations of the network; Optimal ensembles can improve over any single layer. ViT-L/16 DeiT pre-training

| Top-1 Test Error for ViT-L/16 (DeiT pre-training) |                           |      |      |      |
|---------------------------------------------------|---------------------------|------|------|------|
| Dataset                                           | # of InCA queries ( $m$ ) |      |      |      |
|                                                   | 1                         | 2    | 4    | 16   |
| CUB-200                                           | 9.1                       | 9.5  | 9.6  | 9.5  |
| DTD                                               | 17.8                      | 18.4 | 19.2 | 19.1 |
| Aircrafts                                         | 15.8                      | 19.3 | 19.8 | 16.8 |
| MIT-67                                            | 10.1                      | 10.8 | 11.0 | 10.9 |
| Oxford Flowers                                    | 0.3                       | 0.3  | 0.3  | 0.4  |
| Oxford Pets                                       | 4.7                       | 4.7  | 4.5  | 4.4  |
| Stanf. Cars                                       | 8.4                       | 8.7  | 8.8  | 8.2  |
| Stanf. Dogs                                       | 8.1                       | 6.3  | 6.3  | 5.9  |

Table 9: **Varying # of queries in the InCA adapter** We run an ablation testing the effect of applying a different number of queries  $q_1, \dots, q_m$  and then averaging when using the InCA adapter. We observe that in most cases  $m$  does not have a big effect on accuracy and that  $m = 1$  has sufficient representation capacity for the adapter.

895 architecture coarse-range learning rate based on performance on 5 datasets by sweeping over  $\text{lr} =$   
 896  $\{1e-2, 1e-3, 1e-4, 1e-5, 1e-6\}$  followed by a refined sweep with learning rates  $\text{lr} = \text{B}, 2\text{B}$  with  $\text{B}$   
 897 being the optimal coarse learning rate.

898 For the VPT baseline, we follow the details presented in the paper and train with VPT-Deep that  
 899 generally outperforms VPT-Shallow. To train VPT, we use the SGD optimizer with momentum and  
 900 cosine annealing for 100 epochs. For each dataset we run a sweep on the prompt length  $\{5, 20, 100\}$ ,  
 901 base learning rate  $\{0.25, 0.1, 0.05, 0.01\}$ , and weight-decay  $\{1e-2, 1e-4\}$  for a total of 24 runs with  
 902 100-epochs for each dataset. We compare the training cost of InCA and VPT-Deep in Table 7. In  
 903 general we note that the shallow and small architecture of InCA or linear probing that are separate  
 904 from the base model makes them straightforward to optimize, compared with adaptation methods that  
 905 receive back-propagated gradients from a frozen intermediate layer of the network as shown in Fig. 2.

906 For the LoRa baseline [27] we apply a LoRa modified attention to each block’s self-attention layer  
 907 ( $W_k, W_q, W_v$ ) in ViT based architectures and to each block’s WindowAttention for SWIN. For the  
 908 low rank dimension we sweep over the best value among  $d = 5, 10, 50$ . For BitFit we follow the  
 909 discussion in [6] and train all of the bias-parameters in the network in addition to full training of the  
 910 head. Analogously for [42] we follow their procedure with LayerNorm which includes training each  
 911 of the LayerNorm parameters  $(\gamma, \beta)$  for each layer along with training of the head of the pre-trained  
 912 model. For all of the efficient training methods above we sweep over  $\text{lr} = \{3e-5, 1e-4, 3e-4, 1e-3\}$   
 913 to identify the best learning rate for the dataset.

914 **Broader Impacts** Our method, InCA enables efficient and modular model adaptation that can be  
915 applied to any strong available pre-trained backbone. In that sense, InCA reduces the computational  
916 barriers to entry for training and evaluating over a large set of (potentially massive scale) models  
917 and optimization settings to identify a model to be used for downstream adaptation. This bridges  
918 the gap between cutting edge research in general visual representation learning and specific domain  
919 applications, especially since the best performing models are computationally expensive to adapt.  
920 Given that InCA operates well on fine-grained visual datasets, this can have positive applications  
921 in scientific domains such as medical imaging. In many scientific domains, the available datasets  
922 are known to be fine-grained yet also with sparse training data. In addition the ease of use and  
923 reduced computational costs associated with downstream adaptation with InCA makes it possible for  
924 domain experts without machine learning expertise to use InCA without access to large computational  
925 resources. This can enable domain researchers solve their domain problems by leveraging various  
926 public pre-trained models to achieve competitive results.
